# Supplementary material for: The Association between Acute Myocardial Infarction-Related Outcomes and the Ramadan Period: A Retrospective Population-Based Study
Source: MDPI journal article supplement (doi:10.3390/jcm11175145), 2022-08-31
Supplement: s1 [file s1]

**Supplementary Table S1.** Study time-periods specified per year according to the Gregorian calendar.

| Year                    | Period*                   |                           |                           |                           | Total<br>(days) |
|-------------------------|---------------------------|---------------------------|---------------------------|---------------------------|-----------------|
|                         | -1m                       | Ramadan                   | +1m                       | +2m                       |                 |
| 2002                    | 7-Oct-2002 - 5-Nov-2002   | 6-Nov-2002 - 5-Dec-2002   | 6-Dec-2002 - 4-Jan-2003   | 5-Jan-2003 - 3-Feb-2003   | 116             |
| 2003                    | 26-Sep-2003 - 26-Oct-2003 | 27-Oct-2003 - 26-Nov-2003 | 27-Nov-2003 - 27-Dec-2003 | 28-Dec-2003 - 27-Jan-2004 | 120             |
| 2004                    | 16-Sep-2004 - 15-Oct-2004 | 16-Oct-2004 - 14-Nov-2004 | 15-Nov-2004 - 14-Dec-2004 | 15-Dec-2004 - 13-Jan-2005 | 116             |
| 2005                    | 5-Sep-2005 - 4-Oct-2005   | 5-Oct-2005 - 3-Nov-2005   | 4-Nov-2005 - 3-Dec-2005   | 4-Dec-2005 - 2-Jan-2006   | 116             |
| 2006                    | 25-Aug-2006 - 23-Sep-2006 | 24-Sep-2006 - 23-Oct-2006 | 24-Oct-2006 - 22-Nov-2006 | 23-Nov-2006 - 22-Dec-2006 | 116             |
| 2007                    | 14-Aug-2007 - 12-Sep-2007 | 13-Sep-2007 - 12-Oct-2007 | 13-Oct-2007 - 11-Nov-2007 | 12-Nov-2007 - 11-Dec-2007 | 116             |
| 2008                    | 4-Auj-2008 - 1-Sep-2008   | 2-Sep-2008 - 30-Sep-2008  | 1-Oct-2008 - 29-Oct-2008  | 30-Oct-2008 - 27-Nov-2008 | 112             |
| 2009                    | 23-Jul-2009 - 21-Aug-2009 | 22-Aug-2009 - 20-Sep-2009 | 21-Sep-2009 - 20-Oct-2009 | 21-Oct-2009 - 19-Nov-2009 | 116             |
| 2010                    | 12-Jul-2010 - 10-Aug-2010 | 11-Aug-2010 - 9-Sep-2010  | 10-Sep-2010 - 9-Oct-2010  | 10-Oct-2010 - 8-Nov-2010  | 116             |
| 2011                    | 3-Jul-2011 - 31-Jul-2011  | 1-Aug-2011 - 29-Aug-2011  | 30-Aug-2011 - 27-Sep-2011 | 29-Sep-2011 - 26-Oct-2011 | 112             |
| 2012                    | 20-Jun-2012 - 19-Jul-2012 | 20-Jul-2012 - 18-Aug-2012 | 19-Aug-2012 - 17-Sep-2012 | 18-Sep-2012 - 17-Oct-2012 | 116             |
| 2013                    | 9-Jun-2013 - 8-Jul-2013   | 9-Jul-2013 - 7-Aug-2013   | 8-Aug-2013 - 6-Sep-2013   | 7-Sep-2013 - 6-Oct-2013   | 116             |
| 2014                    | 30-May-2014 - 28-Jun-2014 | 29-Jun-2014 - 28-Jul-2014 | 29-Jul-2014 - 27-Aug-2014 | 18-Aug-2014 - 26-Sep-2014 | 116             |
| 2015                    | 20-May-2015 - 17-Jun-2015 | 18-Jun-2015 - 16-Jul-2015 | 17-Jul-2015 - 14-Aug-2015 | 15-Aug-2015 - 12-Sep-2015 | 112             |
| 2016                    | 9-May-2016 - 6-Jun-2016   | 7-Jun-2016 - 5-Jul-2016   | 6-Jul-2016 - 3-Aug-2016   | 4-Aug-2016 - 1-Sep-2016   | 112             |
| 2017                    | 28-Apr-2017 - 26-May-2017 | 27-May-2017 - 24-Jun-2017 | 25-Jun-2017 - 23-Jul-2017 | 24-Jul-2017 - 21-Aug-2017 | 112             |
| <b>Total<br/>(days)</b> | <b>460</b>                | <b>460</b>                | <b>460</b>                | <b>460</b>                | <b>1840</b>     |

Legend: -1m – one-month prior to Ramadan, Ramadan – month of Ramadan, +1m – one-month post-Ramadan, +2m – two-months post-Ramadan.

Ramadan fast begins and ends on the evening of specified date.

**Supplementary Table S2.** Baseline characteristics of the Non-Muslim study population by period.

|                                    | -1 m          | Ramadan       | + 1 m         | + 2 m         | Total         | p     |
|------------------------------------|---------------|---------------|---------------|---------------|---------------|-------|
| N                                  | 1137          | 1179          | 1305          | 1333          | 4954          |       |
| <b>Demographics</b>                |               |               |               |               |               |       |
| Age, Mean (SD)                     | 68.41 (13.38) | 68.56 (13.54) | 69.06 (13.56) | 69.10 (13.64) | 68.80 (13.53) | 0.483 |
| 65-75                              | 299 (26.3)    | 266 (22.6)    | 289 (22.1)    | 311 (23.3)    | 1165 (23.5)   | 0.279 |
| ≥75                                | 386 (33.9)    | 422 (35.8)    | 494 (37.9)    | 491 (36.8)    | 1793 (36.2)   |       |
| Sex, Males                         | 759 (66.8)    | 796 (67.5)    | 842 (64.5)    | 867 (65.0)    | 3264 (65.9)   | 0.351 |
| <b>Cardiac diseases</b>            |               |               |               |               |               |       |
| Cardiomegaly                       | 143 (12.6)    | 125 (10.6)    | 139 (10.7)    | 143 (10.7)    | 550 (11.1)    | 0.353 |
| Supraventricular arrhythmias       | 211 (18.6)    | 244 (20.7)    | 234 (17.9)    | 248 (18.6)    | 937 (18.9)    | 0.329 |
| CHF                                | 218 (19.2)    | 241 (20.4)    | 313 (24.0)    | 312 (23.4)    | 1084 (21.9)   | 0.009 |
| Pulmonary heart disease            | 130 (11.4)    | 126 (10.7)    | 148 (11.3)    | 159 (11.9)    | 563 (11.4)    | 0.810 |
| CIHD                               | 939 (82.6)    | 970 (82.3)    | 1077 (82.5)   | 1060 (79.5)   | 4046 (81.7)   | 0.128 |
| <b>Cardiovascular risk factors</b> |               |               |               |               |               |       |
| Renal diseases                     | 142 (12.5)    | 174 (14.8)    | 196 (15.0)    | 206 (15.5)    | 718 (14.5)    | 0.169 |
| Diabetes mellitus                  | 480 (42.2)    | 513 (43.5)    | 616 (47.2)    | 618 (46.4)    | 2227 (45.0)   | 0.043 |
| Dyslipidemia                       | 841 (74.0)    | 848 (71.9)    | 945 (72.4)    | 943 (70.7)    | 3577 (72.2)   | 0.354 |
| Hypertension                       | 624 (54.9)    | 703 (59.6)    | 758 (58.1)    | 742 (55.7)    | 2827 (57.1)   | 0.072 |
| Obesity                            | 210 (18.5)    | 235 (19.9)    | 288 (22.1)    | 279 (20.9)    | 1012 (20.4)   | 0.156 |
| Smoking                            | 450 (39.6)    | 438 (37.2)    | 493 (37.8)    | 506 (38.0)    | 1887 (38.1)   | 0.666 |
| PVD                                | 166 (14.6)    | 181 (15.4)    | 213 (16.3)    | 191 (14.3)    | 751 (15.2)    | 0.494 |
| Family history of IHD              | 94 (8.3)      | 88 (7.5)      | 92 (7.0)      | 101 (7.6)     | 375 (7.6)     | 0.726 |
| <b>Other disorders</b>             |               |               |               |               |               |       |
| COPD                               | 86 (7.6)      | 105 (8.9)     | 112 (8.6)     | 142 (10.7)    | 445 (9.0)     | 0.055 |
| Neurological disorders             | 220 (19.3)    | 248 (21.0)    | 262 (20.1)    | 291 (21.8)    | 1021 (20.6)   | 0.444 |
| Malignancy                         | 54 (4.7)      | 69 (5.9)      | 63 (4.8)      | 66 (5.0)      | 252 (5.1)     | 0.587 |

|                                                              |            |            |            |            |             |       |
|--------------------------------------------------------------|------------|------------|------------|------------|-------------|-------|
| Anemia                                                       | 533 (46.9) | 582 (49.4) | 680 (52.1) | 671 (50.3) | 2466 (49.8) | 0.075 |
| GI bleeding                                                  | 32 (2.8)   | 46 (3.9)   | 42 (3.2)   | 35 (2.6)   | 155 (3.1)   | 0.279 |
| Schizophrenia/Psychosis                                      | 20 (1.8)   | 18 (1.5)   | 25 (1.9)   | 18 (1.4)   | 81 (1.6)    | 0.681 |
| Alcohol/drug addiction                                       | 32 (2.8)   | 35 (3.0)   | 33 (2.5)   | 37 (2.8)   | 137 (2.8)   | 0.927 |
| History of malignancy                                        | 79 (6.9)   | 84 (7.1)   | 74 (5.7)   | 94 (7.1)   | 331 (6.7)   | 0.402 |
| <b>Administrative characteristics of the hospitalization</b> |            |            |            |            |             |       |
| LOS, >7 days                                                 | 540 (47.5) | 585 (49.6) | 630 (48.3) | 620 (46.5) | 2375 (47.9) | 0.463 |
| STEMI                                                        | 454 (39.9) | 463 (39.3) | 532 (40.8) | 543 (40.7) | 1992 (40.2) | 0.852 |
| <b>Results of echocardiography</b>                           |            |            |            |            |             |       |
| Echocardiography performance                                 | 808 (71.1) | 848 (71.9) | 909 (69.7) | 918 (68.9) | 3483 (70.3) | 0.337 |
| Severe LV dysfunction                                        | 110 (13.6) | 112 (13.2) | 145 (16.0) | 117 (12.7) | 484 (13.9)  | 0.202 |
| LV hypertrophy                                               | 51 (6.3)   | 51 (6.0)   | 44 (4.8)   | 57 (6.2)   | 203 (5.8)   | 0.521 |
| Mitral regurgitation                                         | 46 (5.7)   | 58 (6.8)   | 77 (8.5)   | 77 (8.4)   | 258 (7.4)   | 0.084 |
| Tricuspid regurgitation                                      | 45 (5.6)   | 39 (4.6)   | 44 (4.8)   | 48 (5.2)   | 176 (5.1)   | 0.811 |
| Pulmonary hypertension                                       | 79 (9.8)   | 96 (11.3)  | 96 (10.6)  | 83 (9.0)   | 354 (10.2)  | 0.424 |
| <b>Results of angiography</b>                                |            |            |            |            |             |       |
| Angiography performance                                      | 743 (65.3) | 749 (63.5) | 799 (61.2) | 775 (58.1) | 3066 (61.9) | 0.002 |
| Measure of CAD, No or non-significant                        | 33 (4.4)   | 24 (3.2)   | 40 (5.0)   | 34 (4.4)   | 131 (4.3)   | 0.322 |
| One vessel                                                   | 182 (24.5) | 182 (24.3) | 172 (21.5) | 195 (25.2) | 731 (23.8)  |       |
| Two vessels                                                  | 204 (27.5) | 190 (25.4) | 208 (26.0) | 218 (28.1) | 820 (26.7)  |       |
| Three vessels/ LM                                            | 324 (43.6) | 353 (47.1) | 379 (47.4) | 328 (42.3) | 1384 (45.1) |       |
| <b>Type of treatment</b>                                     |            |            |            |            |             |       |
| Noninvasive                                                  | 353 (31.0) | 363 (30.8) | 439 (33.6) | 496 (37.2) | 1651 (33.3) | 0.014 |
| PCI                                                          | 665 (58.5) | 695 (58.9) | 725 (55.6) | 706 (53.0) | 2791 (56.3) |       |
| CABG                                                         | 119 (10.5) | 121 (10.3) | 141 (10.8) | 131 (9.8)  | 512 (10.3)  |       |

The data are presented as n (%) unless otherwise stated. CABG - coronary artery bypass graft, CAD - coronary artery disease, CHF - chronic heart failure, CIHD - chronic ischemic heart disease, COPD - chronic obstructive pulmonary disease, GI - gastrointestinal, IHD - ischemic heart disease, LM - left main, LOS - length of stay, LV - left ventricular, PCI - percutaneous coronary intervention, PVD - peripheral vascular disease SD - standard deviation, STEMI – ST-elevation myocardial infarction.

Legend: -1m – one-month prior to Ramadan, Ramadan – month of Ramadan, +1m – one-month post-Ramadan, +2m – two-months post-Ramadan.

**Supplementary Table S3.** Results of the multivariate models for one-month mortality: A) for the Muslim population and B) for Non-Muslim population.

A)

| Parameter                | B (SE)         | AdjOR    | (95% CI)         | p     |
|--------------------------|----------------|----------|------------------|-------|
| <b>Period</b>            |                |          |                  |       |
| -1m                      |                | 1 (ref.) |                  |       |
| Ramadan                  | 0.804 (0.545)  | 2.234    | (0.767 ; 6.501)  | 0.140 |
| +1m                      | 0.997 (0.504)  | 2.709    | (1.008 ; 7.280)  | 0.048 |
| +2m                      | 0.420 (0.555)  | 1.522    | (0.513 ; 4.514)  | 0.449 |
| <b>Year of AMI Event</b> |                |          |                  |       |
| 2002                     |                | 1 (ref.) |                  |       |
| 2003                     | 0.858 (1.099)  | 2.358    | (0.274 ; 20.317) | 0.435 |
| 2004                     | 0.122 (1.167)  | 1.130    | (0.115 ; 11.134) | 0.917 |
| 2005                     | -1.348 (1.643) | 0.260    | (0.010 ; 6.505)  | 0.412 |
| 2006                     | 0.415 (1.358)  | 1.514    | (0.106 ; 21.676) | 0.760 |
| 2007                     | 0.329 (1.292)  | 1.390    | (0.110 ; 17.498) | 0.799 |
| 2008                     | 1.293 (1.136)  | 3.645    | (0.393 ; 33.806) | 0.255 |
| 2009                     | -0.256 (1.186) | 0.774    | (0.076 ; 7.905)  | 0.829 |
| 2010                     | 1.305 (1.166)  | 3.688    | (0.375 ; 36.276) | 0.263 |
| 2011                     | -0.319 (1.342) | 0.727    | (0.052 ; 10.075) | 0.812 |
| 2012                     | 0.522 (1.182)  | 1.686    | (0.166 ; 17.088) | 0.659 |
| 2013                     | 0.758 (1.212)  | 2.134    | (0.198 ; 22.976) | 0.532 |
| 2014                     | 2.147 (1.115)  | 8.559    | (0.962 ; 76.170) | 0.054 |
| 2015                     | 1.805 (1.207)  | 6.079    | (0.571 ; 64.749) | 0.135 |
| 2016                     | 0.761 (1.341)  | 2.141    | (0.155 ; 29.648) | 0.570 |

|                                |                |       |                  |        |
|--------------------------------|----------------|-------|------------------|--------|
| 2017                           | 0.436 (1.134)  | 1.546 | (0.167 ; 14.277) | 0.701  |
| <b>Patient characteristics</b> |                |       |                  |        |
| Age, one year increase         | 0.055 (0.015)  | 1.057 | (1.027 ; 1.088)  | <0.001 |
| CIHD                           | -0.994 (0.402) | 0.370 | (0.169 ; 0.813)  | 0.013  |
| Renal diseases                 | 1.230 (0.420)  | 3.420 | (1.502 ; 7.786)  | 0.003  |
| Anemia                         | 0.801 (0.353)  | 2.228 | (1.115 ; 4.449)  | 0.023  |
| GI bleeding                    | 1.981 (0.626)  | 7.248 | (2.124 ; 24.733) | 0.002  |
| Type of AMI, STEMI vs. NSTEMI  | 1.208 (0.337)  | 3.348 | (1.729 ; 6.482)  | <0.001 |
| Severe LV dysfunction          | 1.236 (0.494)  | 3.441 | (1.308 ; 9.056)  | 0.012  |

B)

| Parameter                | B (SE)         | AdjOR    | (95% CI)        | p     |
|--------------------------|----------------|----------|-----------------|-------|
| <b>Period</b>            |                |          |                 |       |
| -1m                      |                | 1 (ref.) |                 |       |
| Ramadan                  | 0.327 (0.176)  | 1.387    | (0.982 ; 1.960) | 0.064 |
| +1m                      | 0.283 (0.175)  | 1.327    | (0.943 ; 1.870) | 0.105 |
| +2m                      | 0.304 (0.172)  | 1.355    | (0.968 ; 1.897) | 0.077 |
| <b>Year of AMI Event</b> |                |          |                 |       |
| 2002                     |                | 1 (ref.) |                 |       |
| 2003                     | 0.447 (0.310)  | 1.563    | (0.851 ; 2.871) | 0.150 |
| 2004                     | 0.409 (0.308)  | 1.505    | (0.823 ; 2.752) | 0.184 |
| 2005                     | -0.101 (0.329) | 0.904    | (0.474 ; 1.723) | 0.759 |
| 2006                     | 0.196 (0.326)  | 1.216    | (0.642 ; 2.306) | 0.548 |
| 2007                     | -0.017 (0.357) | 0.983    | (0.489 ; 1.977) | 0.962 |
| 2008                     | -0.720 (0.423) | 0.487    | (0.212 ; 1.115) | 0.089 |
| 2009                     | 0.402 (0.344)  | 1.495    | (0.762 ; 2.936) | 0.242 |

|                                              |                |       |                 |        |
|----------------------------------------------|----------------|-------|-----------------|--------|
| 2010                                         | -0.274 (0.355) | 0.761 | (0.379 ; 1.526) | 0.441  |
| 2011                                         | -0.094 (0.402) | 0.910 | (0.414 ; 2.001) | 0.815  |
| 2012                                         | 0.095 (0.352)  | 1.100 | (0.552 ; 2.190) | 0.787  |
| 2013                                         | 0.649 (0.344)  | 1.914 | (0.976 ; 3.753) | 0.059  |
| 2014                                         | 0.872 (0.348)  | 2.391 | (1.209 ; 4.729) | 0.012  |
| 2015                                         | 0.747 (0.368)  | 2.110 | (1.026 ; 4.340) | 0.042  |
| 2016                                         | 0.214 (0.378)  | 1.238 | (0.591 ; 2.597) | 0.571  |
| 2017                                         | 0.344 (0.350)  | 1.411 | (0.710 ; 2.804) | 0.326  |
| <b>Patients characteristics</b>              |                |       |                 |        |
| Age, one year increase                       | 0.038 (0.006)  | 1.038 | (1.027 ; 1.05)  | <0.001 |
| CIHD                                         | -0.529 (0.143) | 0.589 | (0.445 ; 0.78)  | <0.001 |
| Renal diseases                               | 1.314 (0.130)  | 3.719 | (2.882 ; 4.800) | <0.001 |
| Dyslipidemia                                 | -0.500 (0.122) | 0.607 | (0.478 ; 0.770) | <0.001 |
| PVD                                          | 0.499 (0.141)  | 1.647 | (1.249 ; 2.172) | <0.001 |
| Malignancy                                   | 0.397 (0.202)  | 1.487 | (1.001 ; 2.211) | 0.049  |
| Anemia                                       | 0.490 (0.132)  | 1.633 | (1.261 ; 2.114) | <0.001 |
| GI bleeding                                  | 0.528 (0.253)  | 1.696 | (1.032 ; 2.787) | 0.037  |
| Type of AMI, STEMI vs. NSTEMI                | 0.890 (0.133)  | 2.435 | (1.875 ; 3.162) | <0.001 |
| Severe LV dysfunction                        | 1.167 (0.184)  | 3.213 | (2.243 ; 4.603) | <0.001 |
| Mitral regurgitation                         | 0.642 (0.238)  | 1.900 | (1.193 ; 3.026) | 0.007  |
| Type of treatment, invasive vs. non-invasive | -0.471 (0.162) | 0.624 | (0.455 ; 0.857) | 0.004  |

AdjOR – adjusted odds ratio, AMI – acute myocardial infarction, B – regression coefficient, CI – confidence interval, CIHD - chronic ischemic heart disease, GI - gastrointestinal, LV - left ventricular, NSTEMI – non-ST-elevation myocardial infarction, PVD - peripheral vascular disease, Ref. – reference group, SE – standard error, STEMI – ST-elevation myocardial infarction.

Legend: -1m – one-month prior to Ramadan, Ramadan – month of Ramadan, +1m – one-month post-Ramadan, +2m – two-months post-Ramadan.
